# Supplementary material
Source: PubMed Central journal article supplement (PMC3189023)
Supplement: 1114209108_pnas.201114209SI.pdf [file 1114209108_pnas.201114209SI.pdf]

# Supporting Information

## Kim and Orr-Weaver 10.1073/pnas.1114209108

### SI Materials and Methods

**RNA in Situ Hybridization.** RNA in situ hybridization with colorimetric signal output was performed as described previously (1). Here 200- to 800-bp exonic fragments were PCR-amplified from *CG7110*, *CG16848*, *CG16956*, *Vm34Ca*, *Tehao*, *CG6866/loqs*, *CG9293*, *CG7099*, *CG10859*, and *beta'Cop*. PCR products were cloned into the pCRII-TOPO dual promoter vector (Invitrogen). Sense and antisense probes were in vitro transcribed and digoxigenin-labeled using either T7 or SP6 polymerase depending on the orientation of the insert, according to the manufacturer's instructions (Roche). Ovaries from WT *OrR* fattened females were dissected in Grace's medium and hybridized at 55 °C. Fluorescent hybridization for *CG16956* was performed using the same DIG-labeled probes and hybridized as described previously (2). Colocalization with the *slbo* marker was assessed using  $\alpha$ -GFP (a gift from Mary-Lou Pardue, Massachusetts Institute of Technology, Cambridge, MA) immunofluorescence immediately after RNA FISH, as described previously for visualizing other proteins in follicle cells (3).

**Isolation of Follicle Cell Populations.** For cell population experiments, follicle cells were isolated using a protocol modified from Bryant et al. (4). Approximately 150 whole ovaries were dissected in ice-cold Schneider's medium supplemented with 10% FBS. Tissue was digested with 0.9 mL of 0.25% Trypsin/EDTA and 0.1 mL of 50-mg/mL collagenase for 15 min at room temperature. The supernatant was strained through a 40- $\mu$ m mesh and spun at 1,000  $\times$  g for 7 min in the cold medium and washed once with nonsupplemented Grace's medium. GFP sorting was performed on a MoFlo2 (Beckman Coulter) at the MIT Koch Institute's

Flow Cytometry Core Facility. Cells were pelleted at 1,000  $\times$  g for 7 min and processed for genomic DNA isolation as described previously (3).

**Transgenic Fly Construction.** To test the *cis* requirements for amplification at *DAFC-34B*, we constructed transposons with various sequences from the most-amplified region of *DAFC-34B* flanked by suppressor of Hairy wing binding sites to control for genomic position-specific integration effects. The 10-kb central amplified regions was PCR-amplified from BACR06A03 using exTaq DNA polymerase (Takara) and primers with AscI and AvrII sites on the forward and reverse sequences, respectively, and cloned into a modified PCRA vector with AscI and AvrII sequences engineered into the multiple cloning site (5). This plasmid, PCRA\_34B\_10kb, was sequence-verified, digested with NotI, and subjected to a partial XhoI digest to transfer the 10-kb insert to the NotI and XhoI sites of Big Parent to generate BP\_34B\_10kb (5). BP\_34B\_6kb was generated from the partial digest of PCRA\_34B\_10kb. The 2.1-kb NheI/XhoI fragment and 1.8-kb XhoI/NheI fragment of PCRA\_34B\_10kb were cloned into the PCRA vector and subsequently transferred to the NotI and XhoI sites Big Parent to generate BP\_34B\_2.1kb and BP\_34B\_1.8kb.

The 1-kb origin mapped by nascent strand analysis was PCR-amplified from BACR06A03 using exTaq DNA polymerase (Takara) and primers with NheI sites. The product was cloned into the original PCRA vector, generating PCRA\_34B\_1kb, which was subsequently cloned into the BP vector at the NotI and XhoI sites to generate BP\_34B\_1kb.

1. Ivanovska I, Khandan T, Ito T, Orr-Weaver TL (2005) A histone code in meiosis: The histone kinase, NHK-1, is required for proper chromosomal architecture in *Drosophila* oocytes. *Genes Dev* 19:2571–2582.
2. Xie F, Orr-Weaver TL (2008) Isolation of a *Drosophila* amplification origin developmentally activated by transcription. *Proc Natl Acad Sci USA* 105:9651–9656.
3. Claycomb JM, MacAlpine DM, Evans JG, Bell SP, Orr-Weaver TL (2002) Visualization of replication initiation and elongation in *Drosophila*. *J Cell Biol* 159:225–236.
4. Bryant Z, et al. (1999) Characterization of differentially expressed genes in purified *Drosophila* follicle cells: Toward a general strategy for cell type-specific developmental analysis. *Proc Natl Acad Sci USA* 96:5559–5564.
5. Lu L, Zhang H, Tower J (2001) Functionally distinct, sequence-specific replicator and origin elements are required for *Drosophila* chorion gene amplification. *Genes Dev* 15:134–146.





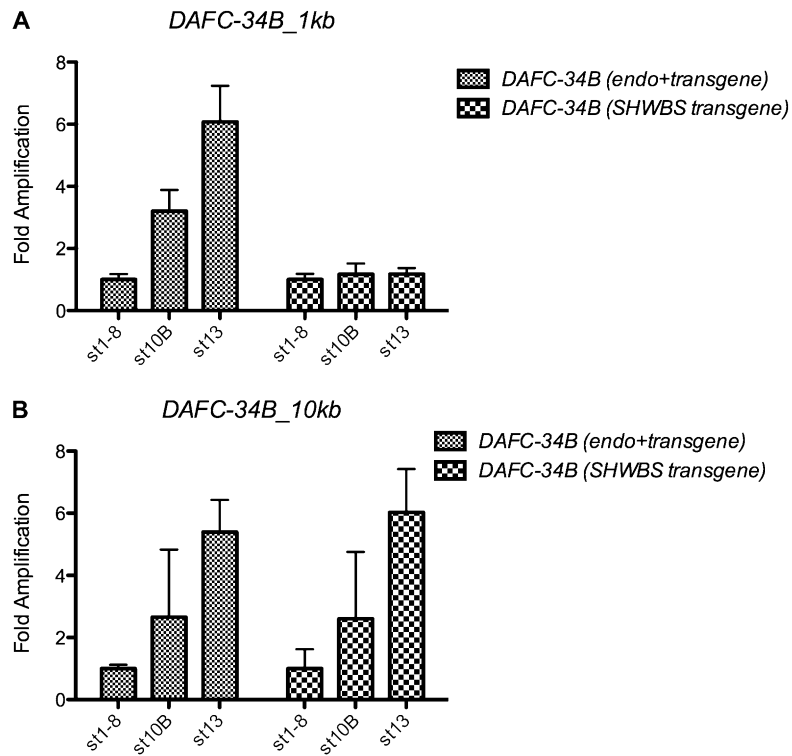

**Fig. S4.** Testing *cis* requirements for amplification at *DAFC-34B*. (A) The 1-kb transposon containing the *DAFC-34B* replication origin does not show ectopic amplification. Primers specific for the transgene (including Suppressor of Hairy Wing binding sequences) can distinguish it from the endogenous *DAFC-34B* locus. (B) The 10-kb transposon containing the *DAFC-34B* replication origin and the ORC binding zone shows ectopic amplification.
